# Supplementary material
Source: HighWire-hosted journal article supplement (https://erj.ersjournals.com/content/56/2/2002461)
Supplement: inline-supplementary-material-1 [file inline-supplementary-material-1.pdf]

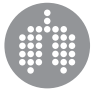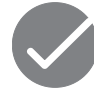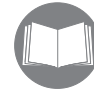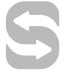

SHAREABLE PDF

# Social stigma in the time of coronavirus disease 2019

Giovanni Sotgiu <sup>1</sup> and Claudia C. Dobler <sup>2,3</sup>

**Affiliations:** <sup>1</sup>Dept of Medical, Surgical and Experimental Sciences, University of Sassari, Sassari, Italy. <sup>2</sup>Institute for Evidence-Based Healthcare, Bond University, Robina, Queensland, Australia. <sup>3</sup>Dept of Respiratory and Sleep Medicine, Liverpool Hospital, Sydney, New South Wales, Australia.

**Correspondence:** Giovanni Sotgiu, Clinical Epidemiology and Medical Statistics Unit, Dept of Medical, Surgical and Experimental Sciences, University of Sassari, Sassari, Italy. E-mail: ggotgiu@uniss.it

 @ERSpublications

**Addressing COVID-19-related stigma** <https://bit.ly/2CPuxO1>

**Cite this article as:** Sotgiu G, Dobler CC. Social stigma in the time of coronavirus disease 2019. *Eur Respir J* 2020; 56: 2002461 [<https://doi.org/10.1183/13993003.02461-2020>].

This single-page version can be shared freely online.

The coronavirus disease 2019 (COVID-19) pandemic has dramatically changed the lives of people around the globe since it appeared in Wuhan, China, at the beginning of December 2019. The burden of disease and its death toll have had an unprecedented impact on the healthcare, economic and financial systems of low-, middle- and high-income countries [1–3]. Peoples' lives have been disrupted and negatively impacted by COVID-19-related suffering and lockdowns at community and household level.
